# Supplementary material for: Modelling the Effect of MUC1 on Influenza Virus Infection Kinetics and Macrophage Dynamics
Source: MDPI journal article supplement (doi:10.3390/v13050850), 2021-05-07
Supplement: s1 [file s1]

# Supplementary Material 1

## Model parameters and Priors

Table S1 gives parameter values for fixed parameters. Table S2 gives the prior distribution for estimated parameters. Note that we estimate  $\beta$ ,  $p$ ,  $\kappa_M$ ,  $s$  and  $\phi$  in logarithmic space. For example, the estimated ranges of  $\log_{10}(\beta)$  were (-8, -4) from literature, which indicate the estimated ranges of  $\beta$  were  $(10^{-8}, 10^{-4})$ . We set the priors which allow us to explore a wide range of biological plausible parameter values.

| Par.          | Description                                                           | Values [Refs] | Unit              |
|---------------|-----------------------------------------------------------------------|---------------|-------------------|
| $g$           | Epithelial cell regrowth rate                                         | 0.8 [1, 2]    | /day              |
| $\gamma_E$    | Maximal stimulation rate of naive CD8 T cells                         | 10 [2]        | /day              |
| $E_{50}$      | Half-maximal stimulating viral titer for CD8 T cells                  | 1e+4          | $[u_V]$           |
| $n_E$         | Number of effector T cell division cycle                              | 5 [2]         | division          |
| $\tau_E$      | Total proliferation time of CD8 T cells                               | 8 [2]         | day               |
| $\phi_E$      | Activation rate of matured CD8 T cells                                | 1.4e+3 [2]    | /day              |
| $\delta_E$    | Decay rate of CD8 T cells                                             | 0.57 [2]      | /day              |
| $\kappa_E$    | Lysing rate of infected cells by CD8 T cells                          | 5e-5 [3]      | /day/cell         |
| $\gamma_B$    | Maximal stimulation rate of naive B cells                             | 6e-2 [2]      | /day              |
| $B_{50}$      | Half-maximal stimulating viral titer for B cells                      | 6e-2          | $[u_V]$           |
| $n_B$         | Number of B cell division cycle                                       | 5 [2]         | division          |
| $\tau_B$      | Total proliferation time of B cells                                   | 8 [2]         | day               |
| $\phi_P$      | Activation rate of matured plasma cells                               | 8 [2]         | /day              |
| $\delta_P$    | Decay rate of plasma cells                                            | 0.5 [2]       | /day              |
| $\mu_S$       | Production rate of short-lived antibody                               | 12 [1, 2, 3]  | $[u_A]$ /cell/day |
| $\delta_{AS}$ | Decay rate of short-lived antibody                                    | 2 [1]         | /day              |
| $\mu_L$       | Production rate of long-lived antibody                                | 4 [3]         | $[u_A]$ /cell/day |
| $\delta_{AL}$ | Decay rate of long-lived antibody                                     | 0.015         | /day              |
| $\kappa_{AS}$ | Neutralisation rate of virus by short-lived antibody                  | 0.8 [3]       | $[u_A]$ /day      |
| $\kappa_{AL}$ | Neutralisation rate of virus by long-lived antibody                   | 0.8 [1, 3]    | $[u_A]$ /day      |
| $T_{max}$     | The maximal number of epithelial cells in the upper respiratory tract | 1e+7 [4]      | cell              |

Table S1: **Parameter values for fixed parameters.**  $[\cdot]$  denotes the unit of variables, e.g., the unit of antibody is denoted as  $[u_A]$ , and the unit of virus is denoted as  $[u_V]$ .

| Par.                  | Description                                       | Estimated values from literature [Refs] | Unit                 | Prior                    |
|-----------------------|---------------------------------------------------|-----------------------------------------|----------------------|--------------------------|
| $\varepsilon_1$       | The effect of MUC1 on viral infectivity           | -                                       | -                    | Uniform(0,1)             |
| $\log_{10}(\beta)$    | Rate of viral infection                           | (-8,-4) [4, 5]                          | /([ $u_V$ ] day)     | Normal(-6,-4)            |
| $\delta_I$            | Death rate of infected cells                      | (0.67, 4.8)[4, 5, 6]                    | /day                 | Lognormal(log(0.89),1)   |
| $\log_{10}(p)$        | Viral production rate                             | (-6,2)[4, 5, 6]                         | [ $u_V$ ]/(cell day) | Normal(-2,4)             |
| $\delta_V$            | Natural death rate of virus                       | (4.2, 59)[4, 5, 6]                      | /day                 | Lognormal(log(28.4),1)   |
| $\log_{10}(\kappa_M)$ | Phagocytosis rate of virus by macrophages         | (-6,-3)[7]                              | /(cell day)          | Normal(-6,4)             |
| $\varepsilon_2$       | The effect of MUC1 on macrophage recruitment      | -                                       | -                    | Uniform(0,1)             |
| $\delta_M$            | Decay rate of macrophages                         | (1/180,1/150)[7]                        | /day                 | Lognormal(log(4.2e-3),1) |
| $\log_{10}(s)$        | Supplementary rate of macrophages                 | (2.52, 2.63)[7]                         | cell/(ml day)        | Normal(3,1)              |
| $\log_{10}(\phi)$     | Recruitment rate of macrophages by infected cells | -                                       | (ml cell)/cell       | Normal(0,3)              |

Table S2: **Priors for estimated model parameters.**  $[\cdot]$  denotes the unit of variables, e.g., the unit of virus is denoted as [ $u_V$ ].

## References

- [1] P. Cao, A. W. Yan, J. M. Heffernan, S. Petrie, R. G. Moss, L. A. Carolan, T. A. Guarnaccia, A. Kelso, I. G. Barr, J. McVernon, et al., Innate immunity and the inter-exposure interval determine the dynamics of secondary influenza virus infection and explain observed viral hierarchies, *PLoS Comput Biol* 11 (8) (2015) e1004334.
- [2] A. W. Yan, P. Cao, J. M. Heffernan, J. McVernon, K. M. Quinn, N. L. La Gruta, K. L. Laurie, J. M. McCaw, Modelling cross-reactivity and memory in the cellular adaptive immune response to influenza infection in the host, *Journal of Theoretical Biology* 413 (2017) 34–49.
- [3] P. Cao, Z. Wang, A. W. Yan, J. McVernon, J. Xu, J. M. Heffernan, K. Kedzierska, J. M. McCaw, On the role of cd8+ t cells in determining recovery time from influenza virus infection, *Frontiers in immunology* 7 (2016) 611.
- [4] A. M. Smith, F. R. Adler, J. L. McAuley, R. N. Gutenkunst, R. M. Ribeiro, J. A. McCullers, A. S. Perelson, Effect of 1918 PB1-F2 expression on influenza A virus infection kinetics, *PLoS Comput Biol* 7 (2) (2011) e1001081.
- [5] P. Baccam, C. Beauchemin, C. A. Macken, F. G. Hayden, A. S. Perelson, Kinetics of influenza A virus infection in humans, *Journal of virology* 80 (15) (2006) 7590–7599.
- [6] H. Miao, J. A. Hollenbaugh, M. S. Zand, J. Holden-Wiltse, T. R. Mosmann, A. S. Perelson, H. Wu, D. J. Topham, Quantifying the early immune response and adaptive immune response kinetics in mice infected with influenza a virus, *Journal of virology* 84 (13) (2010) 6687–6698.
- [7] J. E. Wigginton, D. Kirschner, A model to predict cell-mediated immune regulatory mechanisms during human infection with mycobacterium tuberculosis, *The Journal of Immunology* 166 (3) (2001) 1951–1967.
